# Supplementary material for: Appraisal of Steady-State Stormwater Control Measure Pollutant Removal Models within a Dynamic Stormwater Routing Framework
Source: Atypon-hosted journal article supplement (doi:10.1061/(asce)wr.1943-5452.0001528), 2022-02-09
Supplement: supplemental_materials_wr.1943-5452.0001528_olson.pdf [file supplemental_materials_wr.1943-5452.0001528_olson.pdf]

## SUPPLEMENTAL MATERIALS

*ASCE Journal of Water Resources Planning and Management*

# Appraisal of Steady-State Stormwater Control Measure Pollutant Removal Models within a Dynamic Stormwater Routing Framework

Christopher Olson, Mahshid Ghanbari, Mazdak Arabi, and Larry Roesner

**DOI:** 10.1061/(ASCE)WR.1943-5452.0001528

© ASCE 2022

[www.ascelibrary.org](http://www.ascelibrary.org)

## SUPPLEMENTAL MATERIALS

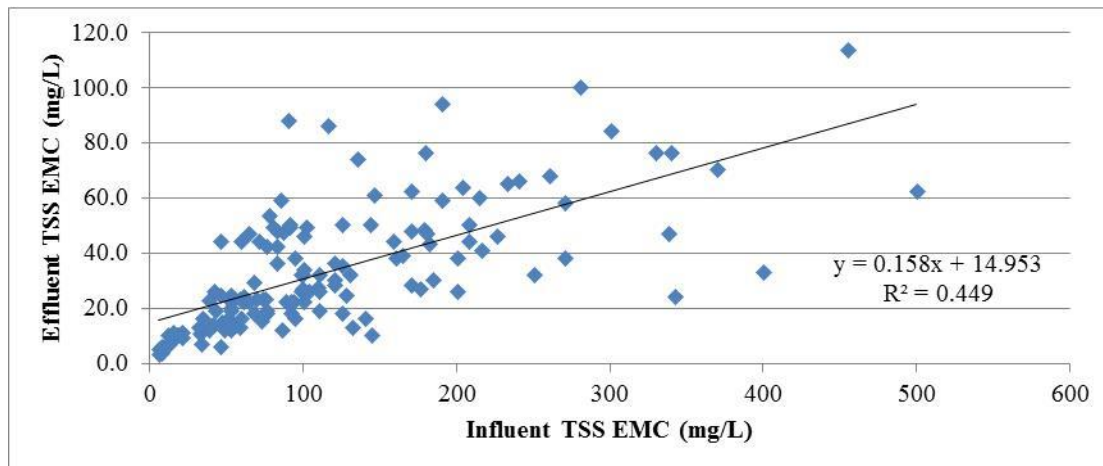

**Fig S1.** The linear regression analysis of 137 pairs of influent/effluent TSS EMCs obtained from the BMP Database. All data were collected from EDBs located within the United States.

## SUPPLEMENTAL MATERIALS

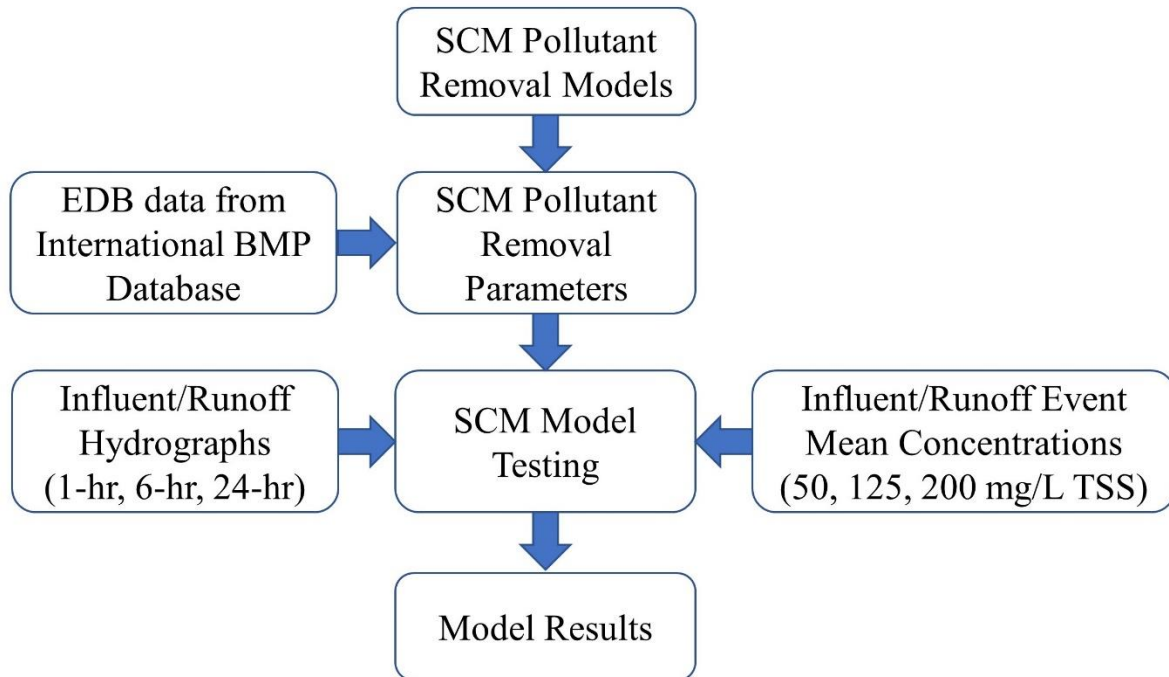

**FigS2.** A flowchart to show the steps involved in the methodology

## SUPPLEMENTAL MATERIALS

**Table S1.** The linear regression analysis output. Values of the standard error of the regression and sum of squares of the residuals were used in the prediction interval and FOVE uncertainty analysis methods.

| <b>Regression Statistics</b> |       |
|------------------------------|-------|
| Multiple R                   | 0.67  |
| R Squared                    | 0.45  |
| Adjusted R Squared           | 0.44  |
| Standard Error               | 16.62 |
| Observation                  | 137   |

| <b>ANOVA</b> |           |           |           |          |                       |
|--------------|-----------|-----------|-----------|----------|-----------------------|
|              | <i>df</i> | <i>SS</i> | <i>MS</i> | <i>F</i> | <i>Significance F</i> |
| Regression   | 1         | 30389.48  | 30389.48  | 110.00   | 3.47E-19              |
| Residual     | 135       | 37296.57  | 276.27    |          |                       |
| Total        | 136       | 67686.05  |           |          |                       |

|           | Coefficient | Standard Error | t Stat | P-value  | Lower 95% | Upper 95% |
|-----------|-------------|----------------|--------|----------|-----------|-----------|
| Intercept | 14.94       | 2.30           | 6.49   | 1.52E-09 | 10.39     | 19.50     |
| 99.13     | 0.16        | 0.02           | 10.49  | 3.43E-19 | 0.13      | 0.19      |
